# Supplementary material for: Long-term metal exposure changes gut microbiota of residents surrounding a mining and smelting area
Source: PubMed Central journal article supplement (PMC7064573; doi:10.1038/s41598-020-61143-7), 2020-03-10
Supplement: 41598_2020_61143_MOESM1_ESM.pdf [file 41598_2020_61143_MOESM1_ESM.pdf]

# **Long-term metal exposure changes gut microbiota of residents surrounding a mining and smelting area**

Mengmeng Shao,<sup>a,1</sup> Yi Zhu<sup>a\*</sup>

<sup>a</sup> The College of Food Science and Nutritional Engineering, China Agricultural University, Beijing 100083, China.

\* Corresponding author: Yi Zhu--zhuyi@cau.edu.cn

Multy samples Rarefaction Curves

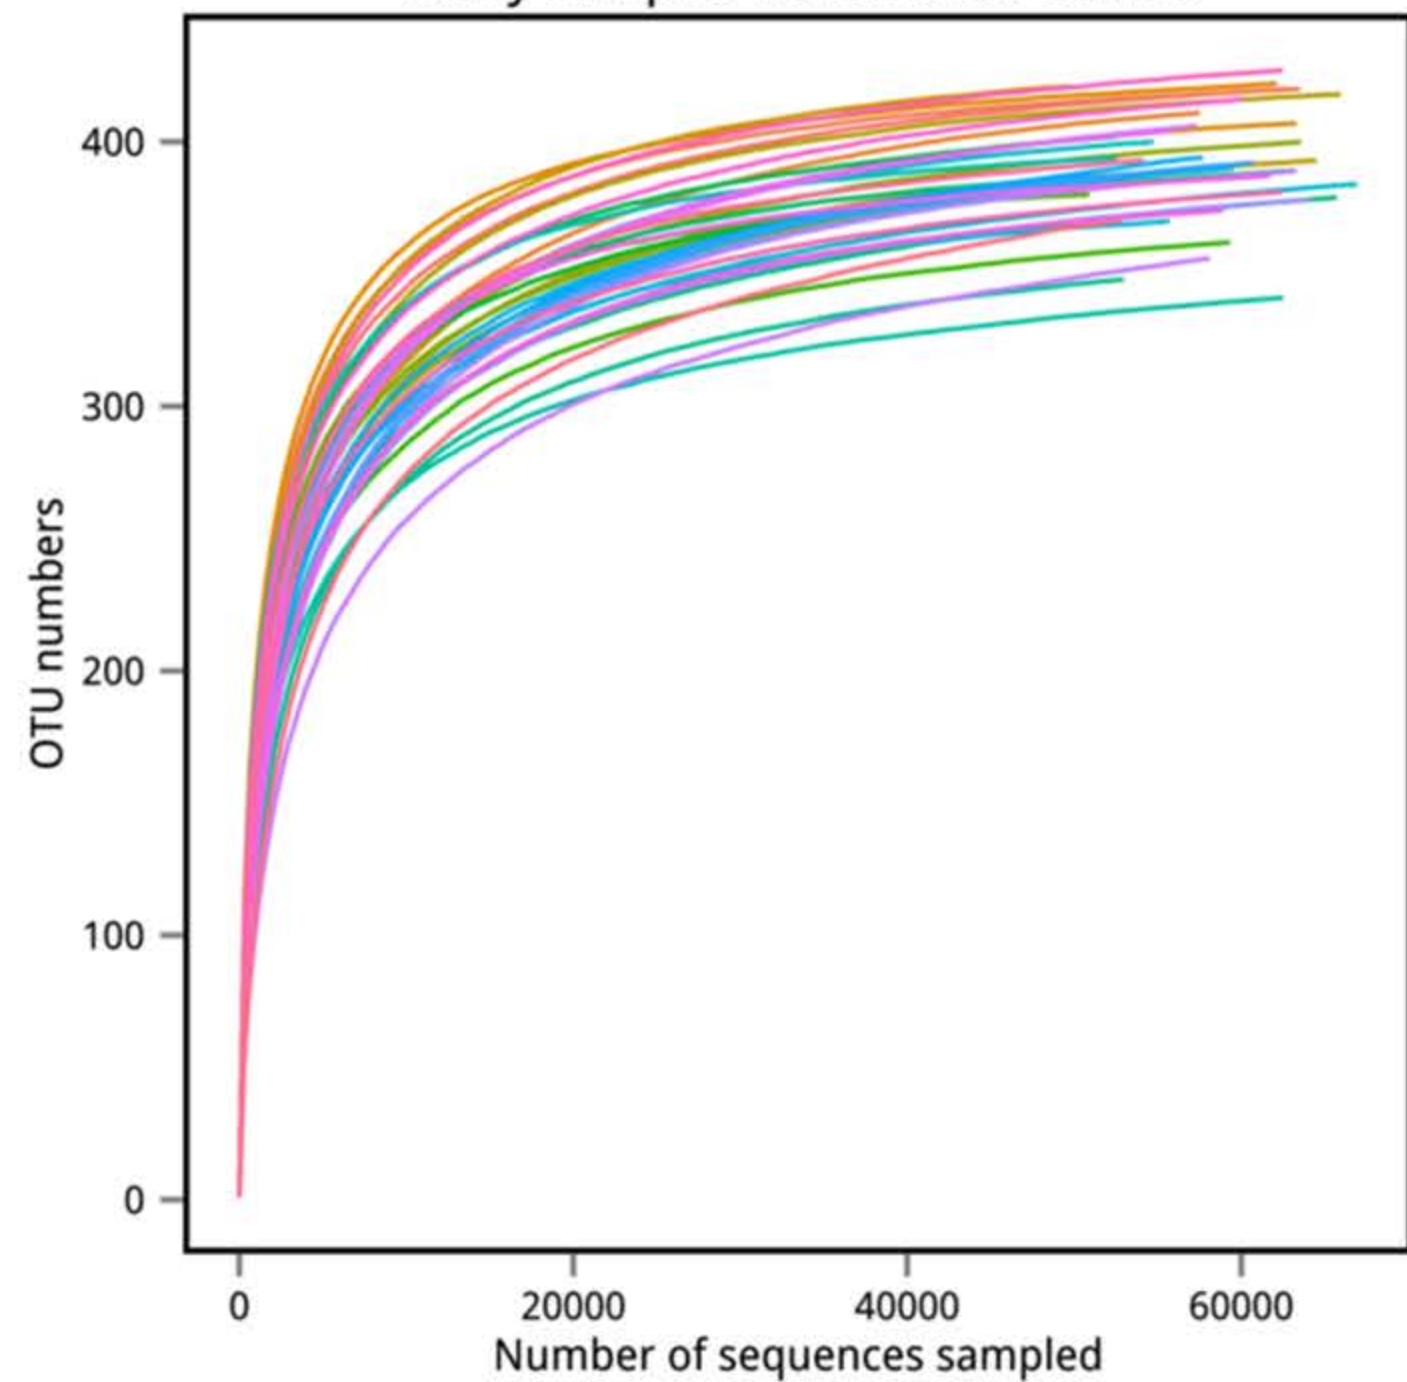

- |     |     |
|-----|-----|
| M1  | T2  |
| M18 | T20 |
| M19 | T3  |
| M2  | T8  |
| M3  | W1  |
| M37 | W12 |
| M4  | W14 |
| M8  | W15 |
| S2  | W16 |
| S5  | W17 |
| S7  | W18 |
| S8  | W19 |
| T1  | W21 |
| T10 | W24 |
| T11 | W25 |
| T13 | W3  |
| T14 | W4  |
| T15 | W5  |
| T16 | W6  |
| T17 | W8  |

(A)

Multy samples Shannon Curves

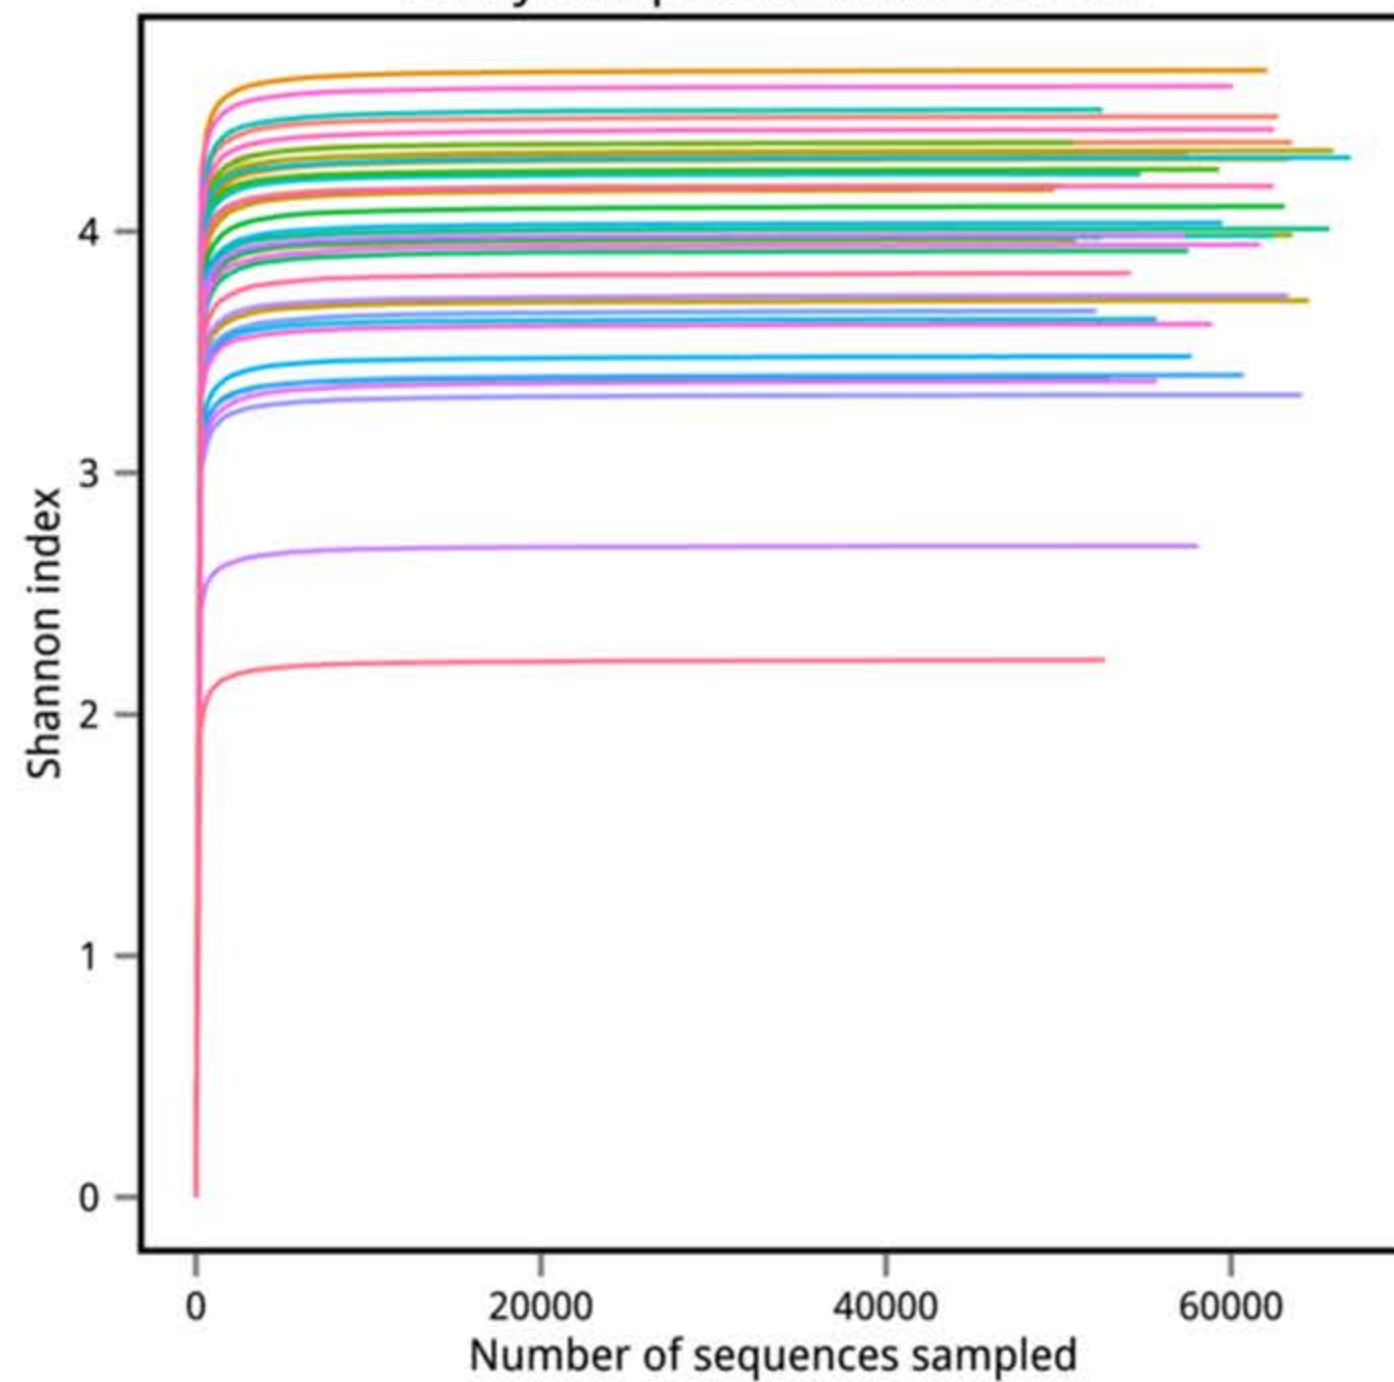

- |     |     |
|-----|-----|
| M1  | T2  |
| M18 | T20 |
| M19 | T3  |
| M2  | T8  |
| M3  | W1  |
| M37 | W12 |
| M4  | W14 |
| M8  | W15 |
| S2  | W16 |
| S5  | W17 |
| S7  | W18 |
| S8  | W19 |
| T1  | W21 |
| T10 | W24 |
| T11 | W25 |
| T13 | W3  |
| T14 | W4  |
| T15 | W5  |
| T16 | W6  |
| T17 | W8  |

(B)
