# Supplementary material for: Long-term metal exposure changes gut microbiota of residents surrounding a mining and smelting area
Source: PubMed Central journal article supplement (PMC7064573; doi:10.1038/s41598-020-61143-7), 2020-03-10
Supplement: 41598_2020_61143_MOESM2_ESM.pdf [file 41598_2020_61143_MOESM2_ESM.pdf]

# **Long-term metal exposure changes gut microbiota of residents surrounding a mining and smelting area**

Mengmeng Shao,<sup>a,1</sup> Yi Zhu<sup>a\*</sup>

<sup>a</sup> The College of Food Science and Nutritional Engineering, China Agricultural University, Beijing 100083, China.

\* Corresponding author: Yi Zhu--zhuyi@cau.edu.cn

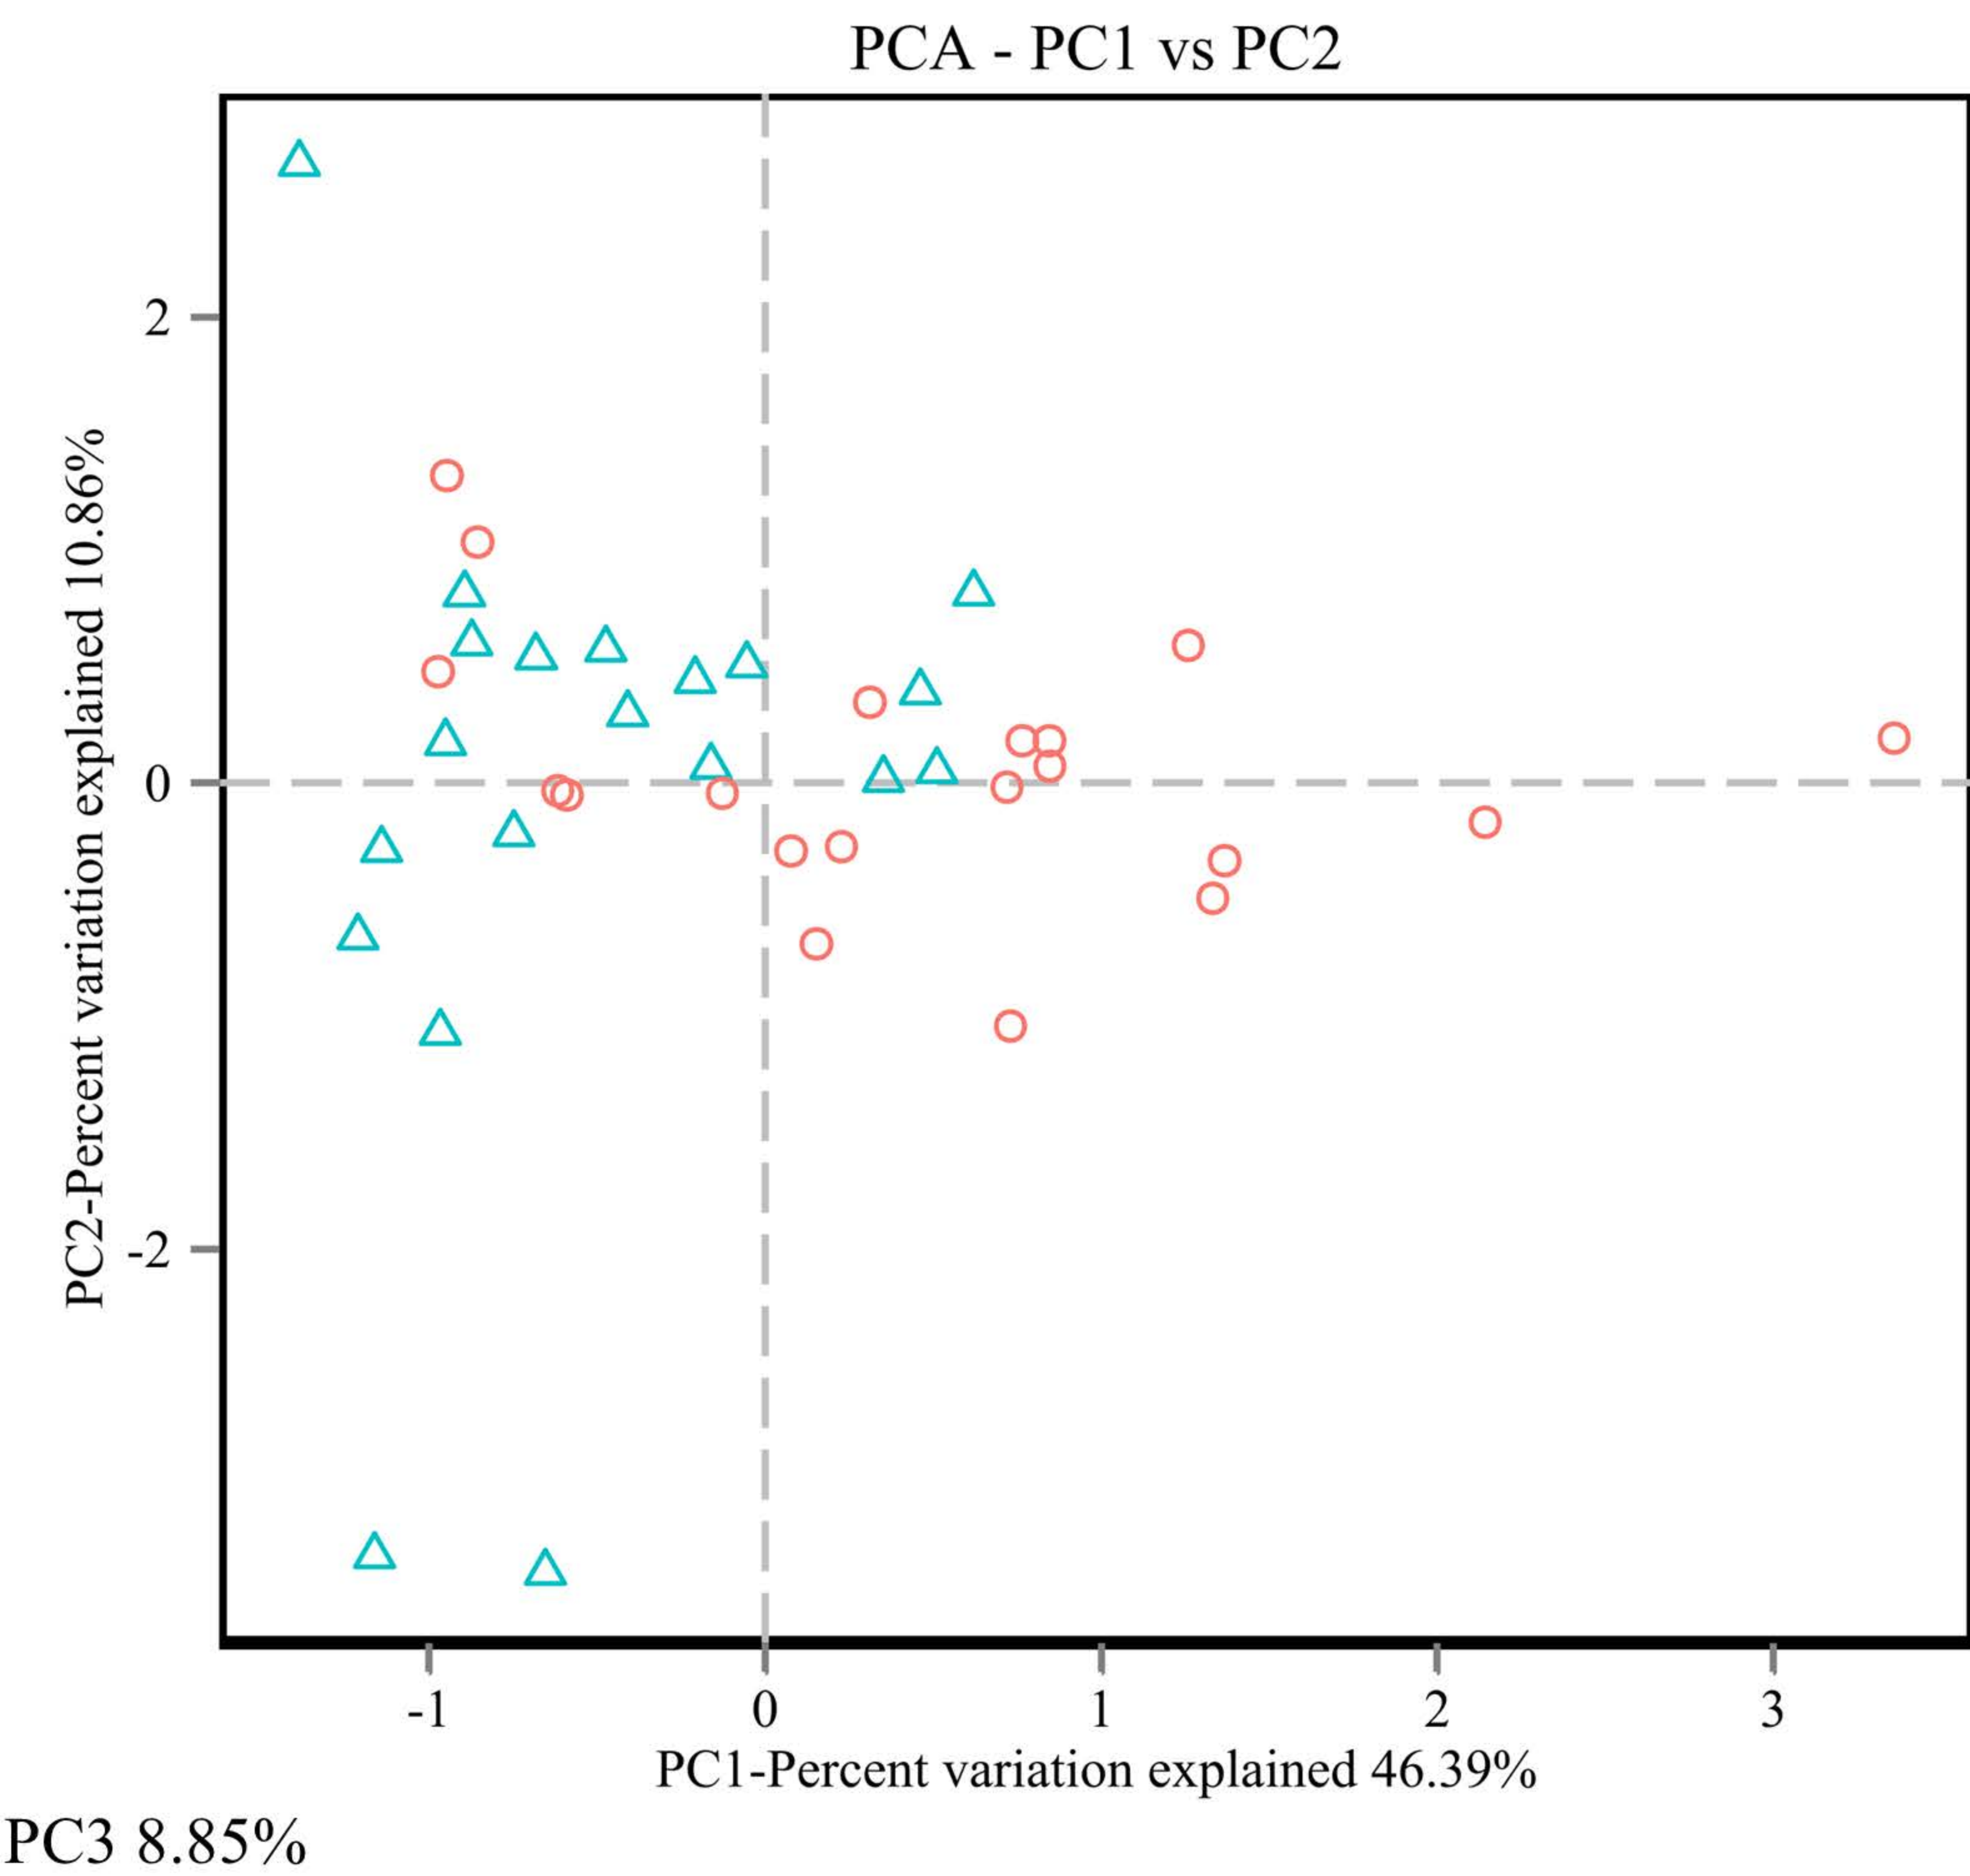

(A)

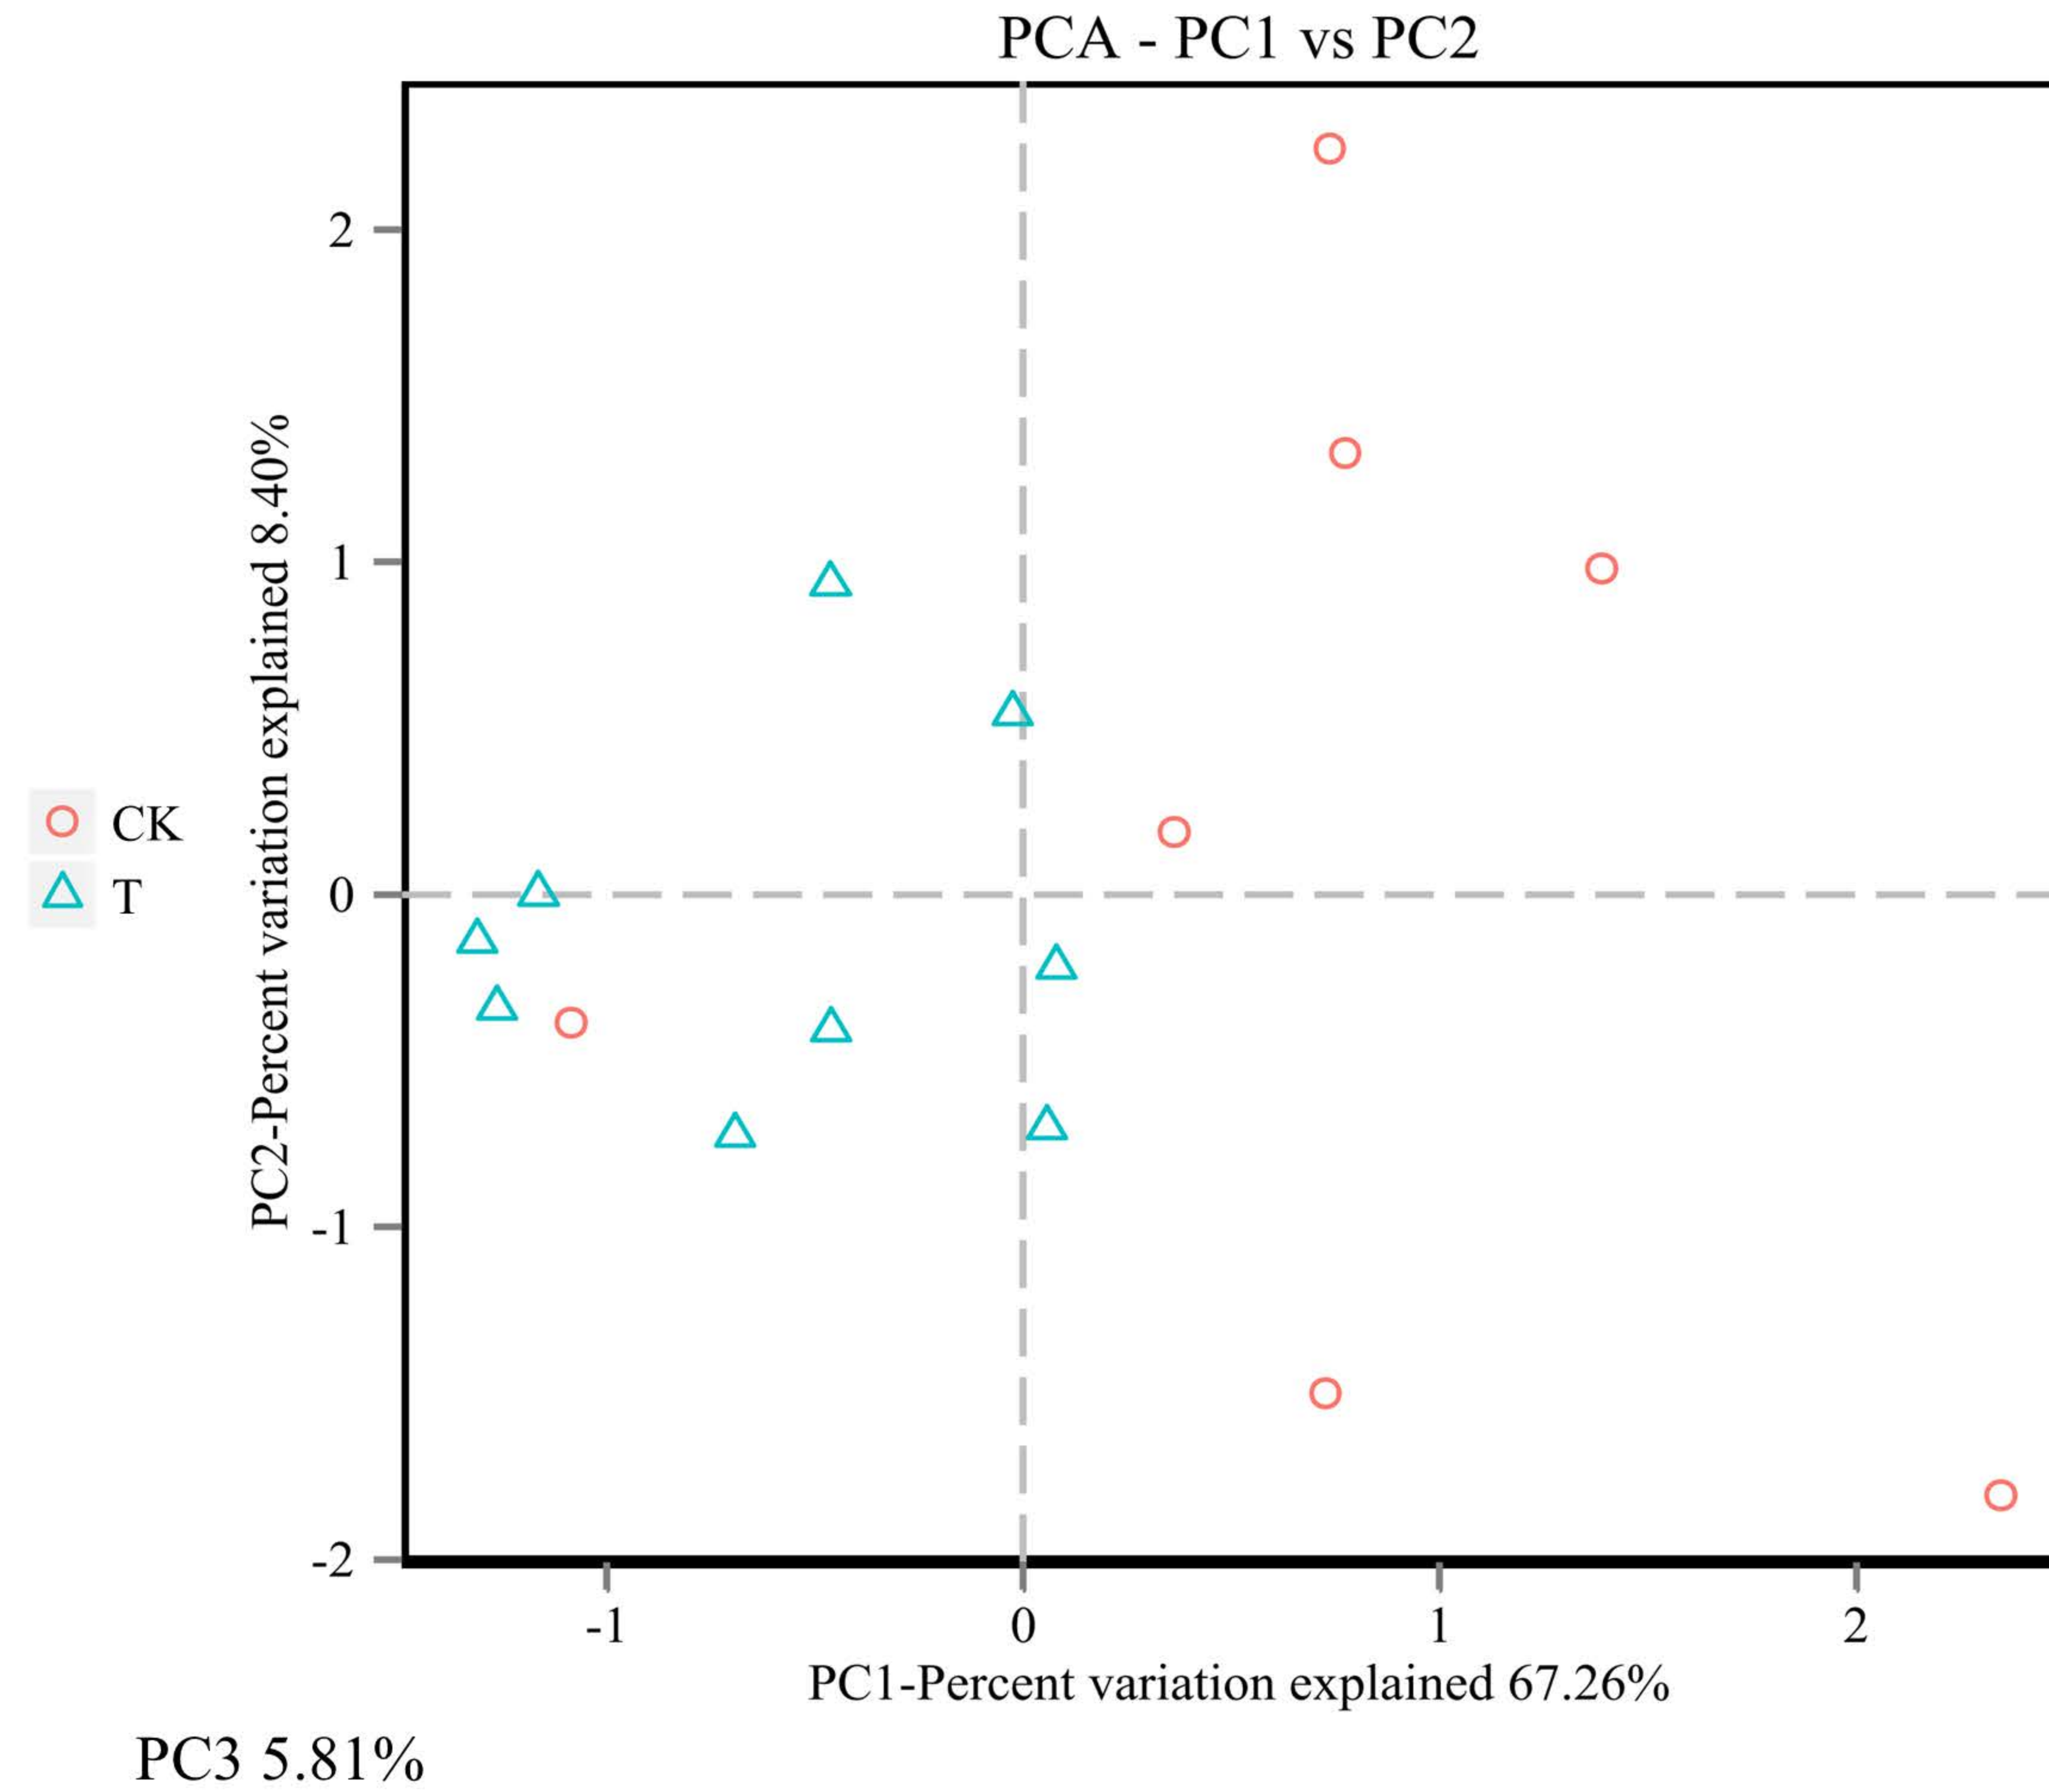

(B)

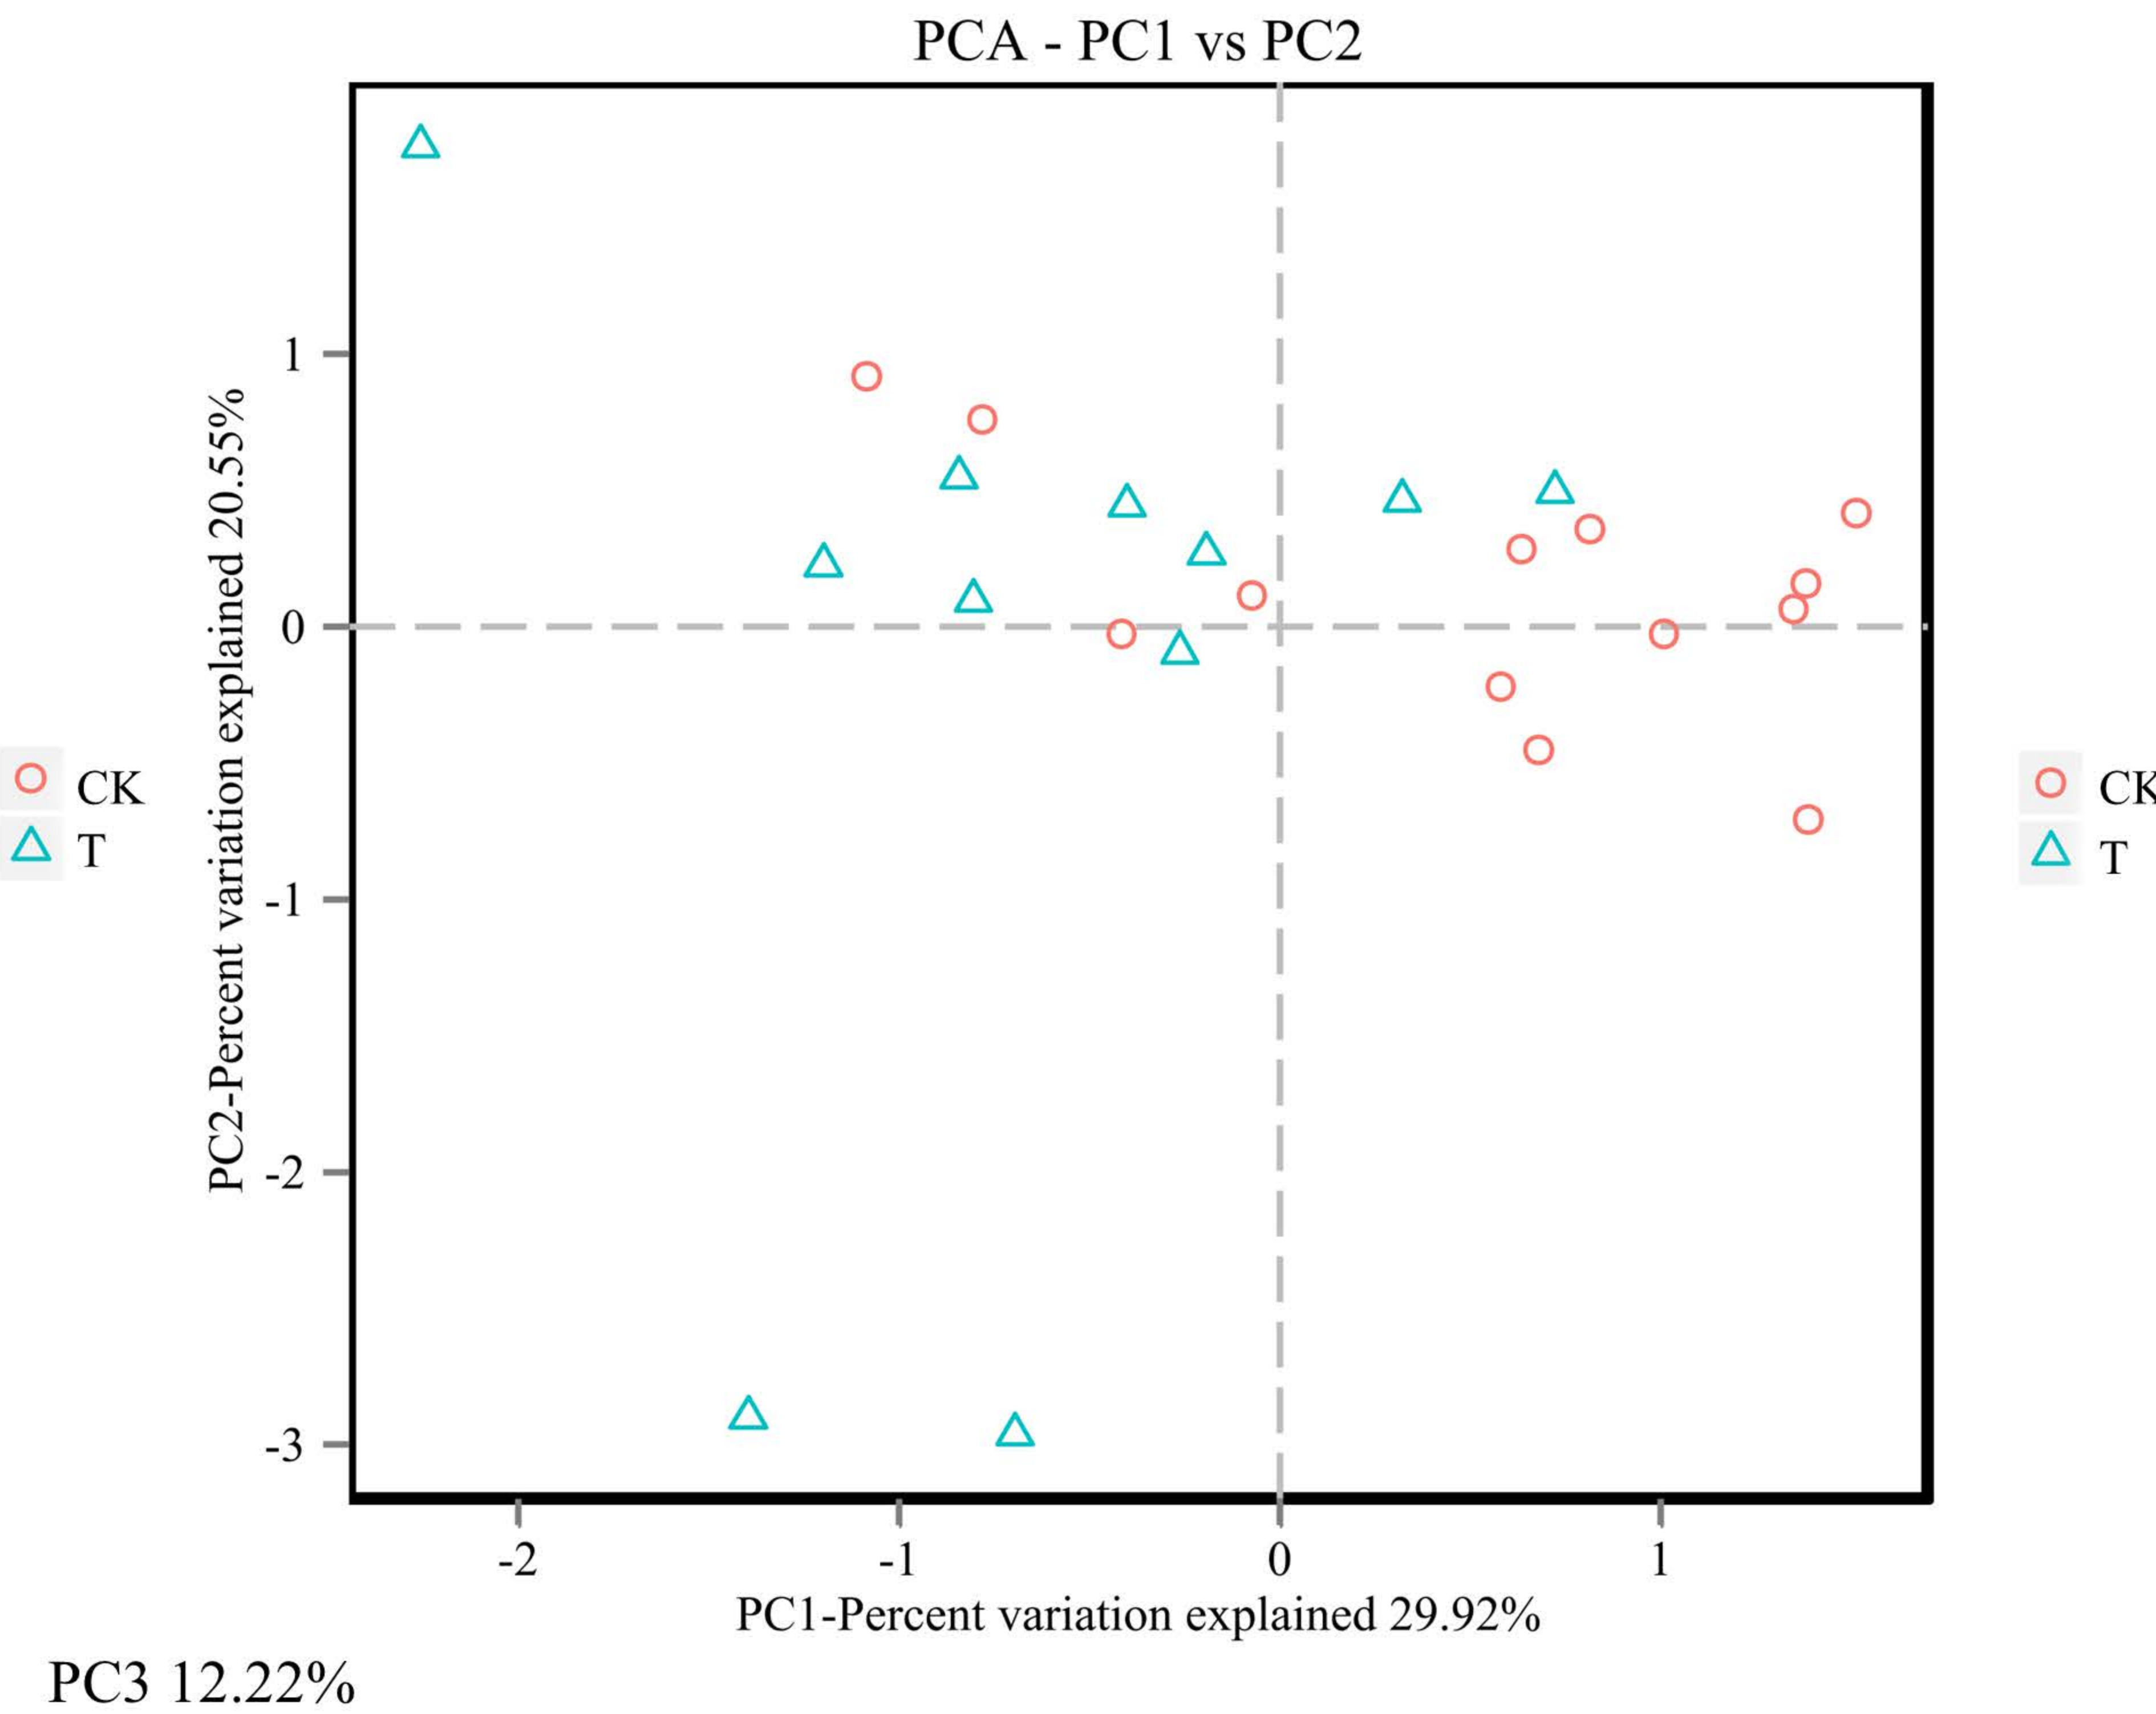

(C)
